# Supplementary material for: Identifying Endogenous Cellular Proteins Destabilizing the Propagation of Swi1 Prion upon Overproduction
Source: MDPI journal article supplement (doi:10.3390/v14071366), 2022-06-23
Supplement: s1 [file s1]

**Figure S1**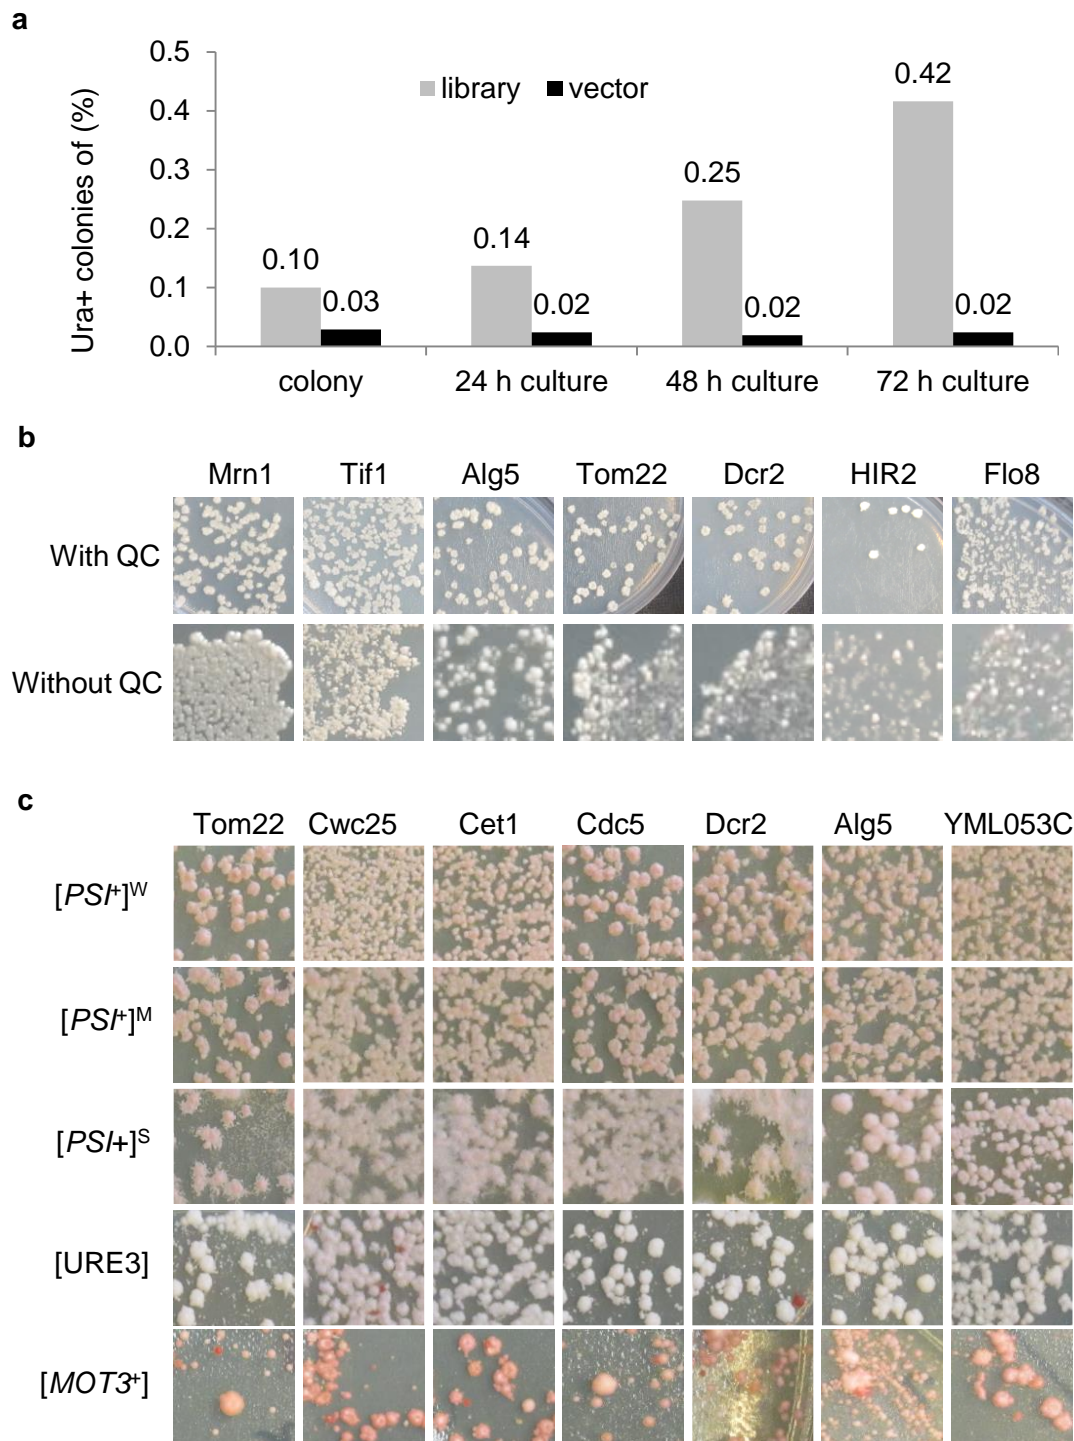

**Figure S1. (a)** Estimation of the phenotypic suppression of [SWI<sup>+</sup>] upon expression of the MoBY 2.0 library. Upon co-transformation of LY770 with the library or vector with *p413SWI-QC*, fresh pooled transformants (colony) and cultures with the indicated cultivation times were spread onto to score for Ura<sup>+</sup> (the suppression of [SWI<sup>+</sup>] phenotype – Ura<sup>-</sup>). **(b)** The Swi1-QC independency of the Ura<sup>-</sup> suppression (see Figure 1c for more data). Shown are growth the tester strain with or without *p413SWI-QC* on a selective medium lacking uracil. **(c)** Anti-[SWI<sup>+</sup>] hits showed no significant affects on propagation of other yeast prions (see Figure 2 for more data).
